# Supplementary material
Source: Research Square preprint supplement (doi:10.21203/rs.3.rs-9106272/v1)
Supplement: Supplementary file 1 [file 6e1d6e5b796ec35a250e8a15.docx]

**SUPLEMENTARY MATERIAL**


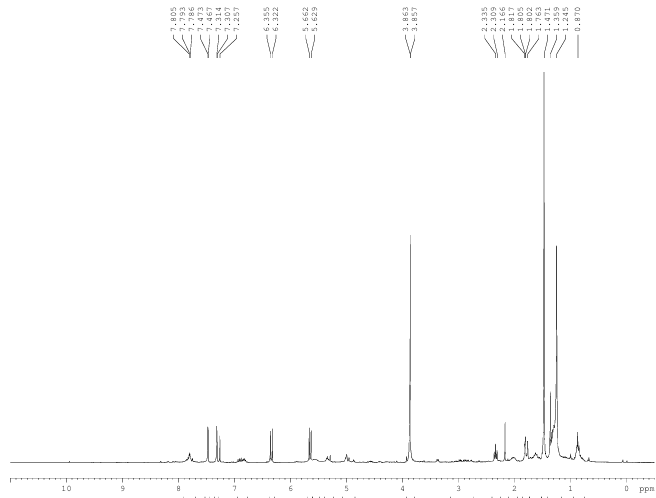


***Figure 1S.*** *1H NMR spectrum (300 MHz, CDCl3) of* **C1** (8-hydroxy-2,2-dimethyl-2H-1-chromene-6-carboxylate).


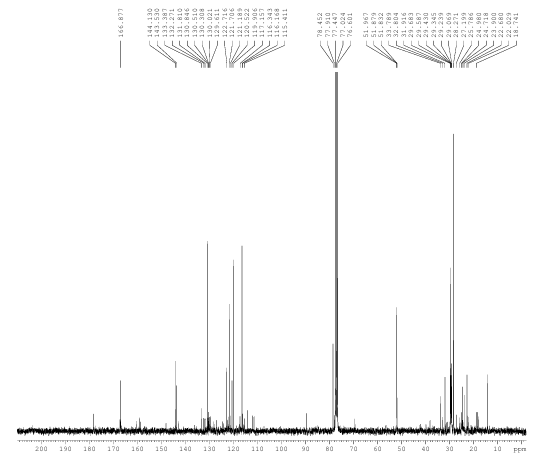


***Figure 2S.*** *13C NMR spectrum (75,5MHz, CDCl3) of* **C1** (8-hydroxy-2,2-dimethyl-2H-1-chromene-6-carboxylate).


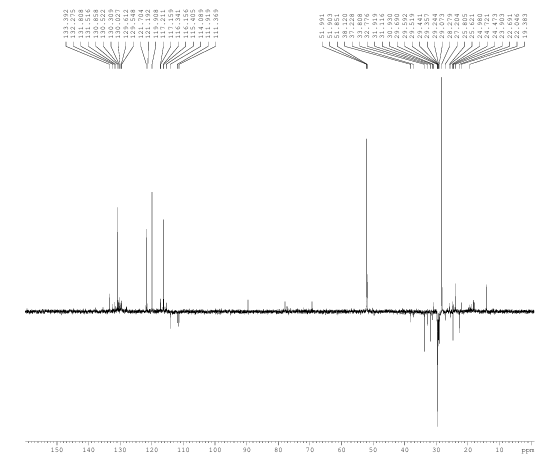


***Figure 3S.*** *DEPT spectrum (75,5MHz, CDCl3) of* **C1** (8-hydroxy-2,2-dimethyl-2H-1-chromene-6-carboxylate).


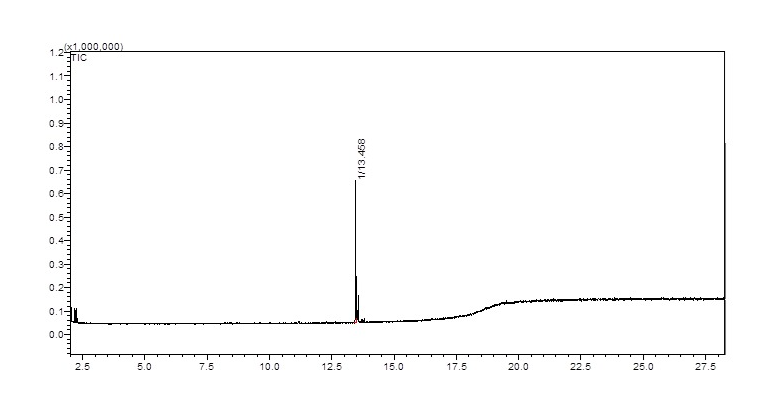


***Figura 4S.*** *Gas Chromatogram profile of* **C1** (8-hydroxy-2,2-dimethyl-2H-1-chromene-6-carboxylate)


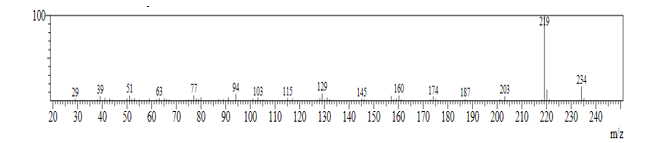


***Figura 5S.*** *Mass Espectrum of* **C1** (8-hydroxy-2,2-dimethyl-2H-1-chromene-6-carboxylate).


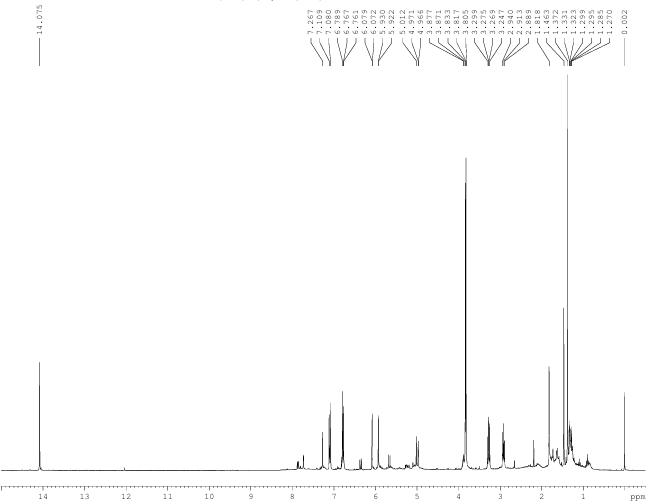


***Figure 6S.*** *1H NMR spectrum (300 MHz, CDCl3) of* **C2 (**2', 6'-dihydroxy-4'-methoxy dihydrochalcone).


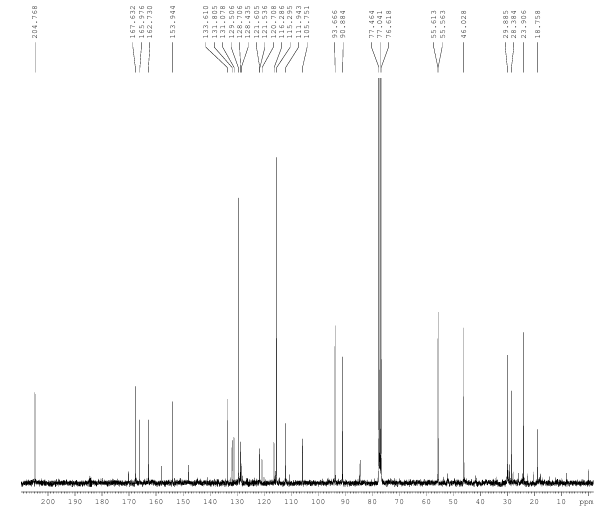


***Figure 7S.*** *13C NMR spectrum (75,5MHz, CDCl3) of* **C2** (2', 6'-dihydroxy-4'-methoxy dihydrochalcone).


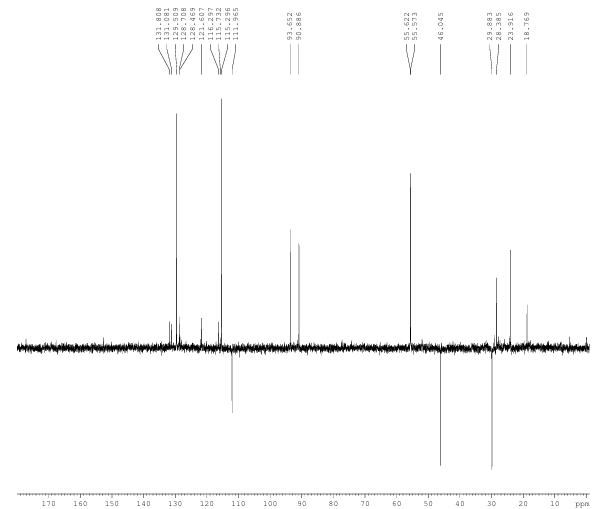


***Figure 8S.*** *DEPT spectrum (75,5MHz, CDCl3) of* **C2** (2', 6'-dihydroxy-4'-methoxy dihydrochalcone).


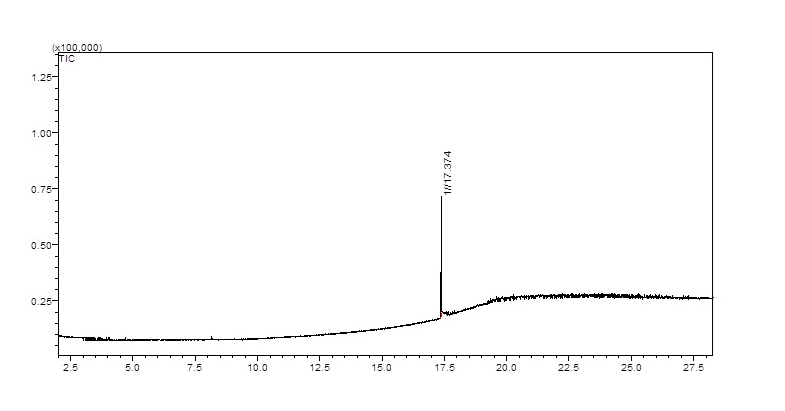


***Figura 9S.*** *Gas Chromatogram profile*  *of* **C2** (2', 6'-dihydroxy-4'-methoxy dihydrochalcone)


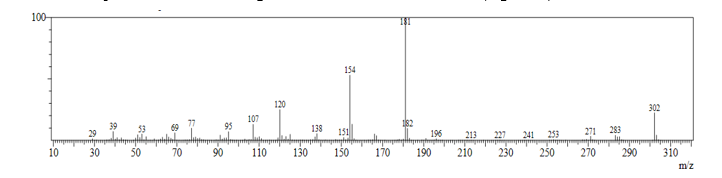


***Figura 10S.*** *Mass Espectrum of* **C2** (2', 6'-dihydroxy-4'-methoxy dihydrochalcone)


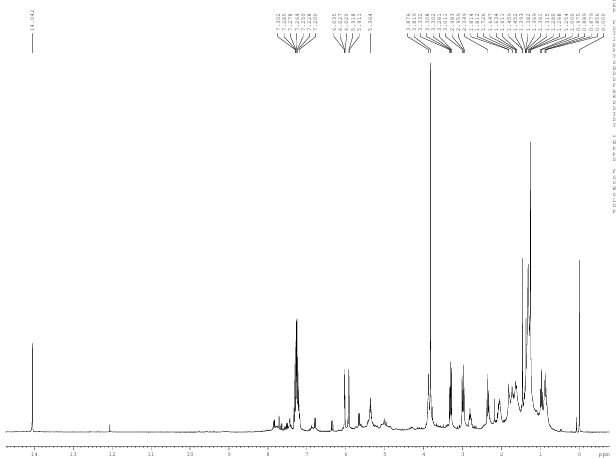


***Figure 11S.*** *1H NMR spectrum ((300 MHz, CDCl3) of* **C3** (2',4-dihydroxy-4',6’-dimethoxy-dihydrochalcone).


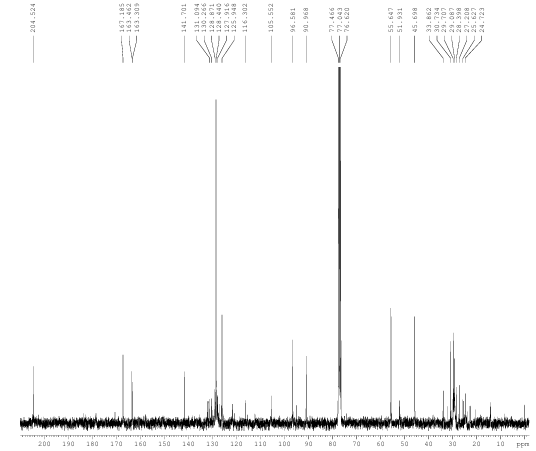


***Figure 12S.*** *Espectro 13C NMR spectrum of* **C3** (2',4-dihydroxy-4',6’-dimethoxy-dihydrochalcone).


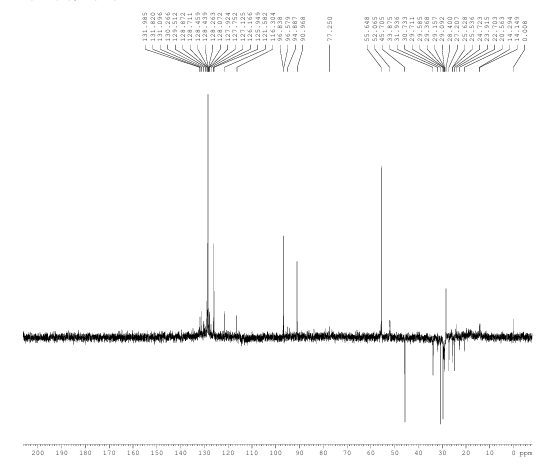


***Figure 13S.*** *DEPT spectrum (75,5MHz, CDCl3) of* **C3** (2',4-dihydroxy-4',6’-dimethoxy-dihydrochalcone).


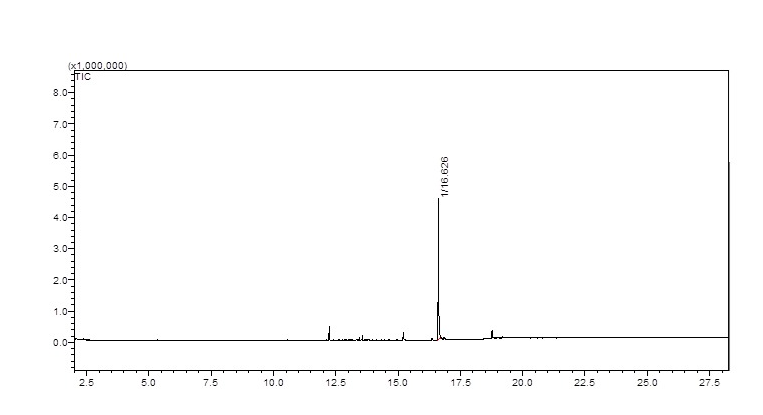


***Figura 14S.*** *Gas Chromatogram profile of* **C3** (2',4-dihydroxy-4',6’-dimethoxy-dihydrochalcone).


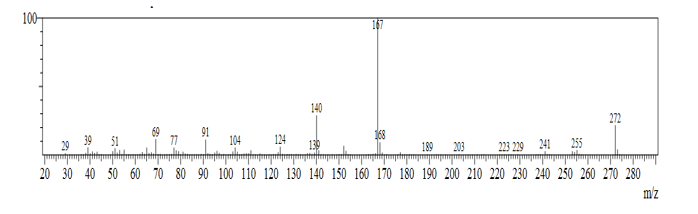


***Figura 15S.*** *Mass Espectrum of* **C3** (2',4-dihydroxy-4',6’-dimethoxy-dihydrochalcone).
